# Supplementary material for: Optimization of cobalt/nitrogen embedded carbon nanotubes as an efficient bifunctional oxygen electrode for rechargeable zinc–air batteries
Source: Royal Society of Chemistry journal article supplement (doi:10.1039/c6ta00615a), 2016-01-01
Supplement: c6ta00615a1.pdf [file c6ta00615a1.pdf]

## Supporting Information

### Optimization of Cobalt/Nitrogen embedded Carbon Nanotube as Efficient Bifunctional Oxygen Electrode for Rechargeable Zinc Air Battery

Junhua Song, Chengzhou Zhu\*, Shaofang Fu, Yang Song, Dan Du and Yuehe Lin\*  
School of Mechanical and Materials Engineering, Washington State University, Pullman, WA 99164, USA.

#### 1. Analysis of electron transfer number

The number of electrons transferred in the oxygen reduction reaction is calculated from Koutecky–Levich plots ( $J^{-1}$  vs.  $\omega^{-1/2}$ ) at range of electrode potentials. The calculation can be carried out using the following Koutecky–Levich equation: 1)  $1/J = 1/J_L + 1/J_K = 1/B\omega^{1/2} + 1/J_K$ , 2)  $B = 0.62nFC_0(D_0)^{2/3}\nu^{1/6}$ , 3)  $J_K = nFkC_0$ . Here  $J$ ,  $J_L$  and  $J_K$  are the measured current density, diffusion limiting current density and kinetic current density, respectively.  $\omega$  is the rotation grade in  $\text{rad s}^{-1}$ .  $n$  is the overall electron transfer number in ORR,  $F$  is the Faraday constant and taken as  $96485 \text{ C mol}^{-1}$ .  $D_0$  is the diffusion coefficient ( $1.9 \times 10^{-5} \text{ cm}^2\text{s}^{-1}$ ),  $\nu$  is the kinetic viscosity of the electrolyte (0.01) and  $C_0$  is the bulk concentration of oxygen ( $1.2 \times 10^{-3} \text{ mol L}^{-1}$ ).  $k$  is the electron-transfer constant. The number of transferred electrons can be calculated based through equation 1) to 3).

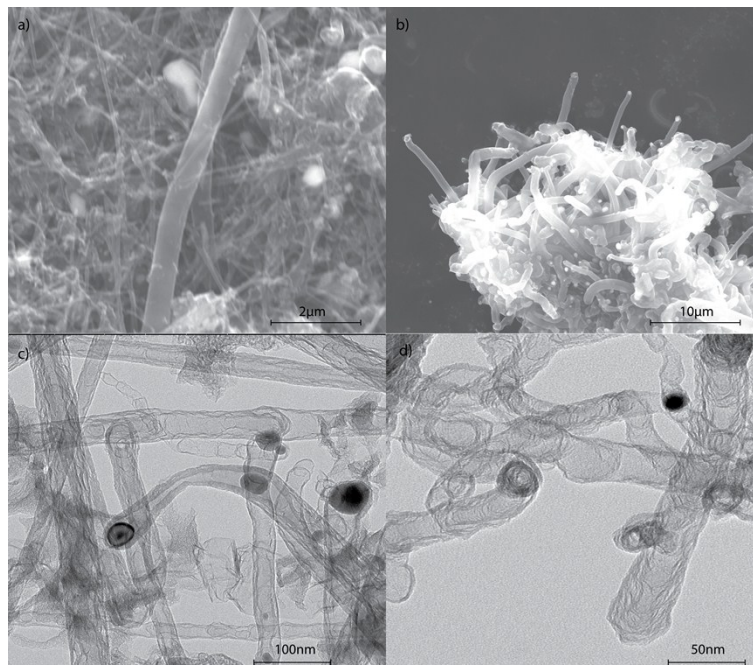

**Fig. S1** a) Transmission electron microscope (TEM) characterization of FeNCN-44. b) Scanning electron microscope (SEM) image of NiNCN-22. c) Picture of FeNCN-44 under TEM survey. d) TEM image of NiNCN-

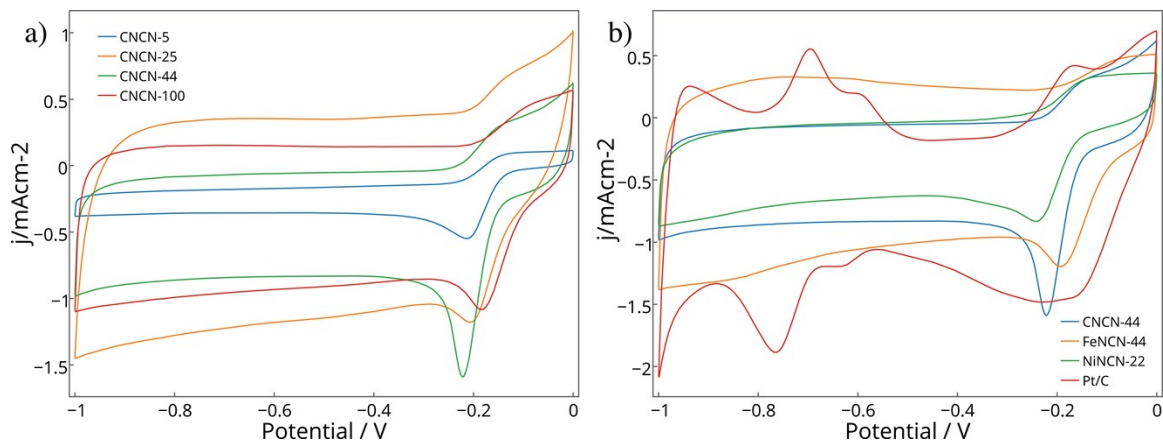

**Fig. S2** Cyclic Voltammetry (CV) plot of CNCN-5, CNCN-25, CNCN-44, CNCN-100, FeNcN-44, NiNcN-22 and commercial Pt/C at a scan rate of 50 mV/s in 0.1M KOH electrolyte. a) CV plots of different CNCN catalysts in O<sub>2</sub>-saturated electrolyte. b) Comparing CV plots of CNCN-44 FeNcN-44, NiNcN-22 and Pt/C in O<sub>2</sub>-saturated electrolyte.

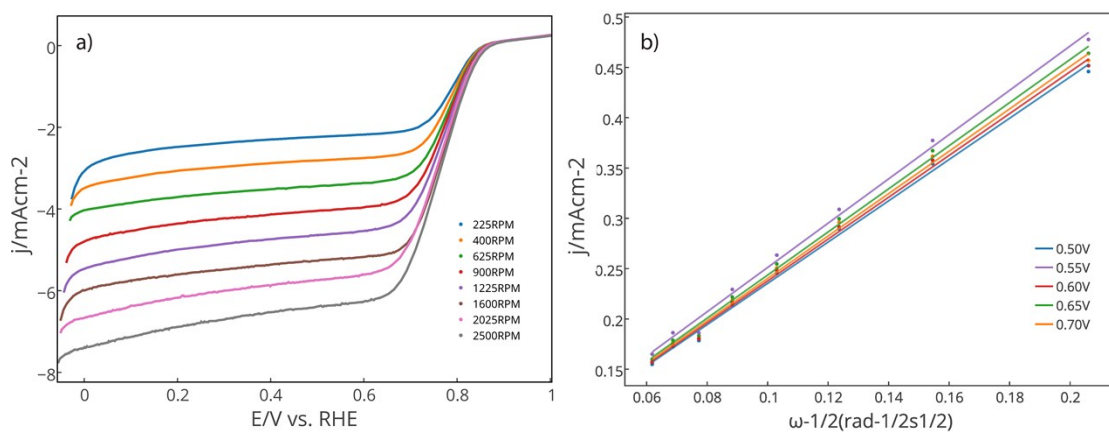

**Fig. S3** a) Linear Sweep Voltammetry plots of optimized CNCN-44 with different rotation rate in 0.1M KOH electrolyte at a scan rate of 10 mV s<sup>-1</sup>. b) Koutecky–Levich (K–L) plots of CNCN-44 obtained from the rotating disk electrode (RDE) results at different potentials.

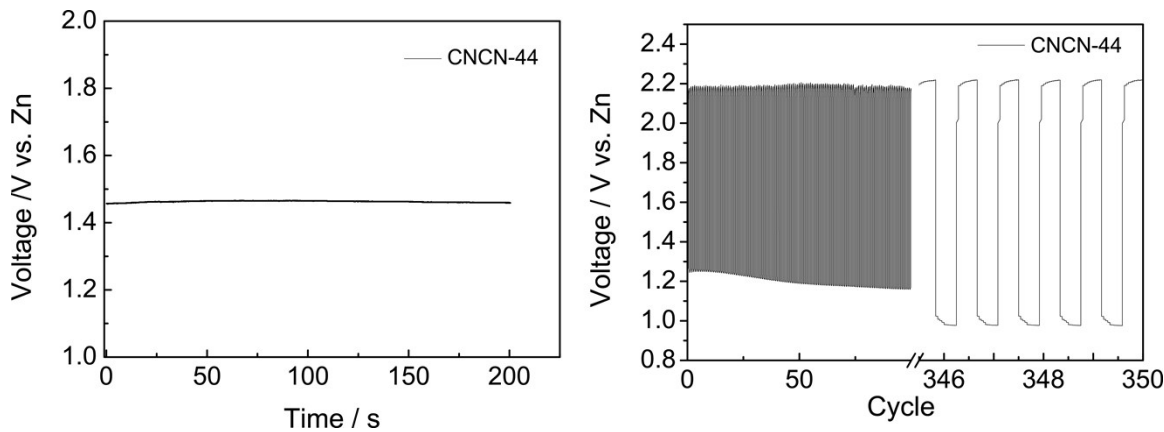

**Fig. S4** a) Open circuit potential of CNCN-44 showing good electron conductivity of the prepared catalyst.  
 c) Long-term cycling performance of CNCN-44 operated at 5 mA cm<sup>-2</sup> with 4 minutes charge-discharge per cycle.

**Table S1.** Comparison of bifunctional electroactivity of CNCN-44 to various reported precious and non-precious catalysts

| Catalyst                         | $E_{\text{ORR}}/\text{V}$ | $E_{\text{OER}}/\text{V}$ | $\Delta E/\text{V}$                 | Ref       |
|----------------------------------|---------------------------|---------------------------|-------------------------------------|-----------|
|                                  | $j=-3\text{mAcm}^{-2}$    | $j=10\text{mAcm}^{-2}$    | $(E_{\text{OER}} - E_{\text{ORR}})$ |           |
| NiCo <sub>2</sub> O <sub>4</sub> | 0.75                      | 1.72                      | 0.97                                | S1        |
| NCo-A <sub>1</sub>               | 0.78                      | 1.62                      | 0.89                                | S2        |
| CoxOy/NC                         | 0.81                      | 1.70                      | 0.89                                | 20        |
| Co/N-C-800                       | 0.74                      | 1.60                      | 0.86                                | 18        |
| CoS <sub>2</sub> (400)/N,S-GO    | 0.79                      | 1.61                      | 0.82                                | S3        |
| N-graphene/CNT                   | 0.69                      | 1.65                      | 0.96                                | 9         |
| 20 wt% Ir/C                      | 0.69                      | 1.61                      | 0.92                                | 19        |
| CNCN-44                          | 0.80                      | 1.61                      | 0.81                                | This work |

**References:**

- S1. Jin, C.; Lu, F. L.; Cao, X. C.; Yang, Z. R.; Yang, R. Z., *J. Mater. Chem. A*, 2013, **1**, 12170-12177.  
 S2. Prabu, M.; Ketpang, K.; Shanmugam, S., *Nanoscale*, 2014, **6**, 3173-3181.  
 S3. Ganesan, P.; Prabu, M.; Sanetuntikul, J.; Shanmugam, S., *ACS Catal.*, 2015, **5**, 3625-3637.
